# Supplementary material for: Hydrogenation of imines by phosphonium borate zwitterions: a theoretical study
Source: Royal Society of Chemistry journal article supplement (doi:10.1039/b818920j), 2009-01-01
Supplement: b818920j.pdf [file b818920j.pdf]

## Supporting Information

for

### Hydrogenation of imines by phosphonium borate zwitterions: a theoretical study

Privalov Timofei

#### Imaginary frequencies for transition states (in $\text{cm}^{-1}$ ):

TS1a: -875

TS1b: -887

TS2a: -69

TS2b: -70

#### Summary of XYZ data, energies (B3LYP/6-31+G\*), and negative eigenvalues (transition states only)

A<sub>a</sub> (Figure 1)

E = -3013.866072

| Atom | X         | Y         | Z         |
|------|-----------|-----------|-----------|
| C    | -1.010327 | -2.663888 | 4.183826  |
| C    | -0.771054 | -1.850115 | 3.070387  |
| C    | 0.357166  | -2.208845 | 2.332036  |
| C    | 1.188094  | -3.282275 | 2.651640  |
| C    | 0.893427  | -4.068258 | 3.760435  |
| C    | -0.219047 | -3.754448 | 4.534791  |
| B    | -1.868812 | -0.680463 | 2.716990  |
| C    | -3.213178 | -1.422056 | 2.150596  |
| C    | -4.434425 | -1.417905 | 2.826894  |
| C    | -5.535280 | -2.174578 | 2.420969  |
| C    | -5.434195 | -2.992258 | 1.300782  |
| C    | -4.236696 | -3.028807 | 0.590665  |
| C    | -3.174419 | -2.244095 | 1.023180  |
| F    | -4.614621 | -0.659279 | 3.931099  |
| F    | -6.691866 | -2.133291 | 3.110536  |
| F    | -6.480916 | -3.735319 | 0.900403  |
| F    | -4.123551 | -3.827922 | -0.489582 |
| F    | -2.033845 | -2.298637 | 0.286613  |
| F    | 0.706567  | -1.497278 | 1.224474  |
| F    | 2.273048  | -3.573788 | 1.901962  |
| F    | 1.671107  | -5.118413 | 4.078481  |
| F    | -0.522342 | -4.511093 | 5.606341  |
| F    | -2.084374 | -2.431318 | 4.971143  |
| C    | -1.299555 | 0.544417  | 1.793816  |
| C    | -0.097870 | 1.186661  | 2.137461  |
| C    | 0.456798  | 2.229810  | 1.412714  |
| C    | -0.201912 | 2.765107  | 0.293332  |
| C    | -1.430057 | 2.174107  | -0.032142 |
| C    | -1.950321 | 1.109736  | 0.685814  |
| P    | 0.512097  | 3.989044  | -0.788266 |
| C    | 0.552991  | 3.431759  | -2.518997 |
| F    | 1.647467  | 2.751586  | 1.788850  |
| F    | 0.586957  | 0.783744  | 3.224515  |

|   |           |           |           |
|---|-----------|-----------|-----------|
| F | -3.142133 | 0.647115  | 0.260715  |
| F | -2.112169 | 2.666201  | -1.101412 |
| C | -0.370233 | 5.575593  | -0.685259 |
| N | 4.010058  | 5.158663  | -0.086081 |
| C | 4.322906  | 6.419542  | 0.622934  |
| C | 3.010014  | 7.221373  | 0.697129  |
| C | 4.711134  | 4.755411  | -1.075975 |
| H | 5.530668  | 5.350098  | -1.499117 |
| C | 4.753382  | 6.003857  | 2.044955  |
| C | 5.418440  | 7.288349  | -0.019572 |
| H | -1.411338 | 5.433917  | -0.989713 |
| H | -0.344925 | 5.940764  | 0.345393  |
| H | 0.106649  | 6.311462  | -1.340574 |
| H | 1.024118  | 4.207367  | -3.131282 |
| H | 1.148994  | 2.517706  | -2.582636 |
| H | -0.459289 | 3.238611  | -2.880803 |
| H | 1.851162  | 4.203599  | -0.406457 |
| H | -2.146592 | -0.123881 | 3.756669  |
| H | 4.914723  | 6.890481  | 2.668806  |
| H | 3.986131  | 5.380282  | 2.514710  |
| H | 5.686065  | 5.429763  | 2.014517  |
| H | 5.545892  | 8.203641  | 0.567940  |
| H | 6.389318  | 6.780391  | -0.043540 |
| H | 5.157952  | 7.587359  | -1.042537 |
| H | 3.150001  | 8.136890  | 1.282263  |
| H | 2.670267  | 7.509533  | -0.305682 |
| H | 2.225479  | 6.627218  | 1.178651  |
| C | 4.485378  | 3.452911  | -1.737451 |
| C | 3.874999  | 2.377368  | -1.066797 |
| C | 3.681458  | 1.158637  | -1.717767 |
| C | 4.098677  | 0.995800  | -3.045098 |
| C | 4.715224  | 2.056280  | -3.715383 |
| C | 4.917909  | 3.273048  | -3.061453 |
| H | 3.590699  | 2.495433  | -0.025048 |
| H | 3.227993  | 0.327027  | -1.184476 |
| H | 3.955830  | 0.042346  | -3.546337 |
| H | 5.047277  | 1.932225  | -4.742630 |
| H | 5.406857  | 4.093413  | -3.583361 |

A<sub>b</sub> (Figure 1)

E = -3249.734045

| Atom | X         | Y         | Z         |
|------|-----------|-----------|-----------|
| C    | 5.714791  | 6.080054  | -3.557277 |
| C    | 5.398494  | 5.094238  | -2.608868 |
| C    | 5.463726  | 3.743144  | -2.986856 |
| C    | 5.823650  | 3.387767  | -4.285100 |
| C    | 6.123022  | 4.378343  | -5.228381 |
| C    | 6.062180  | 5.725582  | -4.861857 |
| C    | 5.038947  | 5.502658  | -1.232799 |
| N    | 4.384483  | 4.754125  | -0.431153 |
| C    | 4.111655  | 5.171882  | 0.965494  |
| C    | 4.720416  | 6.519927  | 1.386658  |
| C    | 2.579791  | 5.234447  | 1.130234  |
| C    | 4.679174  | 4.049150  | 1.857368  |
| P    | 1.343596  | 2.090800  | -1.824052 |
| C    | 0.574765  | 3.507019  | -2.826775 |
| C    | 0.346647  | 1.503302  | -0.451216 |
| C    | 0.885235  | 1.328294  | 0.831695  |
| C    | 0.135651  | 0.769502  | 1.854602  |
| C    | -1.194692 | 0.351058  | 1.708463  |
| C    | -1.736701 | 0.603281  | 0.441126  |
| C    | -0.986565 | 1.120359  | -0.606665 |
| B    | -1.959541 | -0.380339 | 2.963016  |
| C    | -3.450717 | -0.962893 | 2.614380  |
| C    | -4.585186 | -0.569544 | 3.328625  |
| C    | -5.858581 | -1.087571 | 3.089978  |
| C    | -6.038960 | -2.033720 | 2.088490  |
| C    | -4.939904 | -2.453608 | 1.344010  |
| C    | -3.688180 | -1.922989 | 1.631754  |
| F    | -4.508591 | 0.381960  | 4.286445  |
| F    | -6.915118 | -0.675242 | 3.817724  |
| F    | -7.262636 | -2.531602 | 1.834552  |
| F    | -5.106323 | -3.355778 | 0.355197  |
| F    | -2.655121 | -2.342724 | 0.856579  |
| F    | 0.757073  | 0.630868  | 3.044768  |

|   |           |           |           |
|---|-----------|-----------|-----------|
| F | 2.173862  | 1.682063  | 1.065600  |
| F | -1.574910 | 1.286493  | -1.821280 |
| F | -3.020813 | 0.316144  | 0.154398  |
| C | -1.079817 | -1.636843 | 3.562250  |
| C | -1.248412 | -2.028337 | 4.895722  |
| C | -0.610345 | -3.129079 | 5.465184  |
| C | 0.244997  | -3.904000 | 4.685981  |
| C | 0.452236  | -3.553891 | 3.356103  |
| C | -0.204184 | -2.442535 | 2.831714  |
| F | -2.081850 | -1.333836 | 5.700963  |
| F | 0.066184  | -2.162353 | 1.526119  |
| F | 1.285655  | -4.291621 | 2.591005  |
| F | 0.863477  | -4.977053 | 5.211576  |
| F | -0.810009 | -3.456795 | 6.757510  |
| C | 2.094168  | 0.614874  | -2.735273 |
| H | 5.372055  | 6.511755  | -0.958202 |
| C | -0.236773 | 3.029114  | -4.047400 |
| C | -0.325712 | 4.308233  | -1.861940 |
| C | 1.733509  | 4.419335  | -3.291687 |
| C | 3.060282  | 1.164988  | -3.796658 |
| C | 2.808044  | -0.227817 | -1.655272 |
| C | 1.007104  | -0.239367 | -3.410923 |
| H | 2.453795  | 2.697401  | -1.214581 |
| H | -2.082693 | 0.499297  | 3.781319  |
| H | 4.448308  | 4.246028  | 2.910291  |
| H | 4.245108  | 3.083207  | 1.585662  |
| H | 5.767769  | 3.980662  | 1.750405  |
| H | 4.491773  | 6.706421  | 2.441117  |
| H | 5.811777  | 6.524306  | 1.281005  |
| H | 4.311616  | 7.359372  | 0.811357  |
| H | 2.317532  | 5.479546  | 2.165294  |
| H | 2.146040  | 6.002817  | 0.478703  |
| H | 2.125010  | 4.269149  | 0.890744  |
| H | 5.190314  | 2.996526  | -2.249228 |
| H | 5.848010  | 2.340899  | -4.576273 |
| H | 6.386758  | 4.097142  | -6.244454 |
| H | 6.276747  | 6.497419  | -5.595395 |
| H | 5.673315  | 7.129268  | -3.271792 |
| H | 3.324871  | -1.058466 | -2.151054 |
| H | 3.558330  | 0.340401  | -1.093083 |
| H | 2.103790  | -0.664504 | -0.942805 |
| H | 1.486538  | -1.128326 | -3.838003 |
| H | 0.250577  | -0.585665 | -2.701072 |
| H | 0.509401  | 0.290731  | -4.226894 |
| H | 3.486614  | 0.321095  | -4.346605 |
| H | 2.555313  | 1.804920  | -4.527650 |
| H | 3.868728  | 1.752986  | -3.367685 |
| H | -0.660904 | 5.212543  | -2.383523 |
| H | -1.212048 | 3.747645  | -1.560079 |
| H | 0.211969  | 4.628072  | -0.963303 |
| H | 1.295295  | 5.267686  | -3.830641 |
| H | 2.309609  | 4.814792  | -2.450655 |
| H | 2.427276  | 3.922651  | -3.974200 |
| H | -0.699494 | 3.909463  | -4.509055 |
| H | 0.397318  | 2.563031  | -4.807580 |
| H | -1.034774 | 2.335945  | -3.778858 |

### TS1<sub>a</sub> (Figure 2)

E = -3013.855828

Negative eigenvalue: -875cm<sup>-1</sup>

| Atom | X         | Y         | Z         |
|------|-----------|-----------|-----------|
| C    | -1.346784 | 0.069320  | -0.126729 |
| C    | -0.928426 | -0.024043 | 1.203795  |
| C    | 0.030235  | -1.009275 | 1.434675  |
| C    | 0.547813  | -1.841507 | 0.445864  |
| C    | 0.103305  | -1.701628 | -0.864284 |
| C    | -0.858647 | -0.738492 | -1.151493 |
| B    | -1.575058 | 0.973182  | 2.332759  |
| C    | -0.939031 | 2.478499  | 2.272968  |
| C    | -1.738232 | 3.604284  | 2.482059  |
| C    | -1.266758 | 4.913301  | 2.425681  |
| C    | 0.069132  | 5.147212  | 2.125176  |
| C    | 0.907290  | 4.062367  | 1.888866  |
| C    | 0.395729  | 2.769273  | 1.979712  |
| F    | -3.042233 | 3.459474  | 2.824535  |

|   |           |           |           |
|---|-----------|-----------|-----------|
| F | -2.084498 | 5.955849  | 2.670501  |
| F | 0.544372  | 6.404360  | 2.068110  |
| F | 2.202635  | 4.275512  | 1.582994  |
| F | 1.288168  | 1.767021  | 1.786452  |
| F | 0.519438  | -1.208062 | 2.688889  |
| F | 1.484223  | -2.768565 | 0.738882  |
| F | 0.591708  | -2.488383 | -1.840556 |
| F | -1.308254 | -0.606320 | -2.415606 |
| F | -2.284627 | 0.978183  | -0.480893 |
| C | -1.615327 | 0.318963  | 3.834914  |
| C | -2.328061 | -0.872915 | 4.026910  |
| C | -2.559560 | -1.440554 | 5.268038  |
| C | -2.088950 | -0.853615 | 6.451200  |
| C | -1.365088 | 0.333209  | 6.275929  |
| C | -1.131173 | 0.882762  | 5.022994  |
| P | -2.384371 | -1.603987 | 8.066394  |
| C | -0.816745 | -1.580549 | 9.025990  |
| F | -3.269534 | -2.597958 | 5.335959  |
| F | -2.843953 | -1.526859 | 2.964809  |
| F | -0.402870 | 2.019672  | 5.011582  |
| F | -0.883233 | 0.975960  | 7.373967  |
| C | -3.506136 | -0.481281 | 8.997424  |
| N | -3.322268 | -4.529485 | 7.661014  |
| C | -2.172142 | -5.480837 | 7.600778  |
| C | -1.056132 | -4.799088 | 6.781633  |
| C | -4.490939 | -4.848484 | 7.234082  |
| H | -4.642950 | -5.813342 | 6.746680  |
| C | -1.722815 | -5.702971 | 9.057659  |
| C | -2.508175 | -6.832736 | 6.950147  |
| H | -3.006126 | 0.473712  | 9.184038  |
| H | -4.414169 | -0.306808 | 8.414863  |
| H | -3.777303 | -0.932707 | 9.958126  |
| H | -0.967892 | -2.091479 | 9.982955  |
| H | -0.025935 | -2.093635 | 8.471950  |
| H | -0.502769 | -0.551360 | 9.210475  |
| H | -2.958000 | -3.141067 | 7.881185  |
| H | -2.751071 | 1.071908  | 2.059184  |
| H | -0.821553 | -6.324930 | 9.081895  |
| H | -1.491400 | -4.751686 | 9.549619  |
| H | -2.505555 | -6.205410 | 9.636452  |
| H | -1.608150 | -7.454892 | 6.954994  |
| H | -3.289079 | -7.380307 | 7.489911  |
| H | -2.812179 | -6.719579 | 5.902862  |
| H | -0.217462 | -5.490094 | 6.651072  |
| H | -1.416689 | -4.516656 | 5.787724  |
| H | -0.671842 | -3.904105 | 7.279573  |
| C | -5.693932 | -4.014737 | 7.321712  |
| C | -6.690625 | -4.186026 | 6.345009  |
| C | -7.861630 | -3.432394 | 6.391772  |
| C | -8.069080 | -2.530843 | 7.439625  |
| C | -7.098986 | -2.382458 | 8.437016  |
| C | -5.916025 | -3.116013 | 8.378272  |
| H | -6.539440 | -4.902328 | 5.540771  |
| H | -8.617702 | -3.560531 | 5.622505  |
| H | -8.988145 | -1.953371 | 7.486173  |
| H | -7.276981 | -1.706262 | 9.268710  |
| H | -5.186450 | -3.039763 | 9.178666  |

### TS1<sub>b</sub> (Figure 2)

Negative eigenvalue: -887 cm<sup>-1</sup>

E = -3249.706522

| Atom | X         | Y         | Z         |
|------|-----------|-----------|-----------|
| C    | -0.388758 | -0.078976 | -0.212160 |
| C    | -0.310754 | 0.088772  | 1.182461  |
| C    | 0.937034  | 0.319187  | 1.782260  |
| C    | 2.093239  | 0.362319  | 1.001924  |
| C    | 2.013661  | 0.156554  | -0.377475 |
| C    | 0.771772  | -0.071479 | -0.983480 |
| C    | -1.537082 | 0.198164  | 1.987010  |
| N    | -1.717135 | -0.306950 | 3.157376  |
| C    | -2.847288 | 0.182756  | 4.028305  |
| C    | -4.010078 | 0.807443  | 3.234637  |
| C    | -3.385716 | -0.989702 | 4.854075  |

Electronic Supplementary Information for Dalton Transactions  
This journal is © The Royal Society of Chemistry 2009

|   |           |           |           |
|---|-----------|-----------|-----------|
| C | -2.225491 | 1.246776  | 4.955950  |
| P | -0.382101 | -3.154068 | 3.747742  |
| C | -1.652803 | -4.356214 | 2.947564  |
| C | -0.232199 | -3.469082 | 5.547281  |
| C | -0.066779 | -2.391349 | 6.432691  |
| C | 0.196530  | -2.561779 | 7.786130  |
| C | 0.335888  | -3.814977 | 8.401470  |
| C | 0.172328  | -4.881840 | 7.514841  |
| C | -0.093057 | -4.724514 | 6.157152  |
| B | 0.614640  | -3.882350 | 10.020479 |
| C | 0.372762  | -5.338780 | 10.733529 |
| C | -0.821460 | -5.668984 | 11.380408 |
| C | -1.019259 | -6.863119 | 12.076053 |
| C | 0.010780  | -7.794241 | 12.149502 |
| C | 1.214714  | -7.521462 | 11.509538 |
| C | 1.362046  | -6.322689 | 10.818645 |
| F | -1.875698 | -4.818864 | 11.357309 |
| F | -2.195391 | -7.127639 | 12.681991 |
| F | -0.154565 | -8.950800 | 12.818061 |
| F | 2.220583  | -8.416509 | 11.562734 |
| F | 2.551976  | -6.145419 | 10.193147 |
| F | 0.354731  | -1.435221 | 8.514405  |
| F | -0.112610 | -1.119629 | 5.938130  |
| F | -0.185792 | -5.848140 | 5.399285  |
| F | 0.300540  | -6.155778 | 7.944191  |
| C | 2.097456  | -3.287113 | 10.407962 |
| C | 2.336701  | -2.807656 | 11.701214 |
| C | 3.559930  | -2.292212 | 12.124132 |
| C | 4.624732  | -2.239294 | 11.228995 |
| C | 4.440609  | -2.707920 | 9.933549  |
| C | 3.200851  | -3.221298 | 9.561347  |
| F | 1.352748  | -2.840553 | 12.628512 |
| F | 3.111417  | -3.688404 | 8.285589  |
| F | 5.466602  | -2.668192 | 9.057138  |
| F | 5.815018  | -1.736246 | 11.607152 |
| F | 3.724863  | -1.836940 | 13.382331 |
| C | 1.406920  | -3.416576 | 3.100448  |
| H | -2.314998 | 0.826687  | 1.550340  |
| C | -1.102310 | -5.709476 | 2.453049  |
| C | -2.774943 | -4.640537 | 3.966702  |
| C | -2.240492 | -3.592073 | 1.738552  |
| C | 1.431067  | -3.287308 | 1.565417  |
| C | 2.270423  | -2.306042 | 3.732240  |
| C | 2.018185  | -4.769556 | 3.510694  |
| H | -1.027309 | -1.496305 | 3.489182  |
| H | -0.180876 | -3.101229 | 10.488597 |
| H | -2.989971 | 1.616859  | 5.647748  |
| H | -1.404613 | 0.831340  | 5.543110  |
| H | -1.848937 | 2.095318  | 4.373636  |
| H | -4.820217 | 1.039123  | 3.932488  |
| H | -3.739404 | 1.749478  | 2.746052  |
| H | -4.409380 | 0.117454  | 2.481480  |
| H | -4.126802 | -0.618323 | 5.568571  |
| H | -3.887421 | -1.720131 | 4.212191  |
| H | -2.596656 | -1.488055 | 5.422184  |
| H | 0.984984  | 0.487495  | 2.854331  |
| H | 3.054052  | 0.552912  | 1.471431  |
| H | 2.915449  | 0.182464  | -0.983006 |
| H | 0.709875  | -0.227554 | -2.056691 |
| H | -1.355684 | -0.228243 | -0.687130 |
| H | 3.296628  | -2.406547 | 3.356007  |
| H | 1.912242  | -1.311812 | 3.463034  |
| H | 2.312006  | -2.386943 | 4.822170  |
| H | 3.038186  | -4.812745 | 3.106975  |
| H | 2.097429  | -4.874442 | 4.594867  |
| H | 1.471261  | -5.626539 | 3.117623  |
| H | 2.475311  | -3.289507 | 1.228380  |
| H | 0.933567  | -4.127480 | 1.073659  |
| H | 0.975437  | -2.359630 | 1.211972  |
| H | -3.586857 | -5.167431 | 3.449198  |
| H | -2.431423 | -5.280578 | 4.782100  |
| H | -3.194558 | -3.731844 | 4.400207  |
| H | -2.969830 | -4.236572 | 1.232600  |
| H | -2.759989 | -2.677477 | 2.041968  |
| H | -1.473938 | -3.323700 | 1.003741  |
| H | -1.940713 | -6.272671 | 2.023262  |
| H | -0.353449 | -5.600574 | 1.664770  |

H -0.683835 -6.310252 3.259855

**B<sub>1a</sub> (Figure 3)**

E = -3013.877135

| Atom | X         | Y         | Z         |
|------|-----------|-----------|-----------|
| C    | -1.856953 | -0.873827 | 4.378566  |
| C    | -1.191731 | -1.094311 | 3.168517  |
| C    | -0.717427 | -2.396286 | 3.002980  |
| C    | -0.897951 | -3.412572 | 3.940317  |
| C    | -1.581504 | -3.142041 | 5.120910  |
| C    | -2.059992 | -1.855202 | 5.345304  |
| B    | -1.123840 | 0.117818  | 2.064472  |
| C    | -2.616959 | 0.288239  | 1.395866  |
| C    | -3.272236 | 1.518266  | 1.340007  |
| C    | -4.587830 | 1.681961  | 0.907916  |
| C    | -5.316489 | 0.572653  | 0.495310  |
| C    | -4.704529 | -0.677589 | 0.506708  |
| C    | -3.386059 | -0.786890 | 0.941088  |
| F    | -2.632693 | 2.664457  | 1.708882  |
| F    | -5.163242 | 2.904439  | 0.883649  |
| F    | -6.589753 | 0.707505  | 0.082374  |
| F    | -5.393413 | -1.758093 | 0.092151  |
| F    | -2.842660 | -2.025128 | 0.895611  |
| F    | -0.053653 | -2.743230 | 1.870874  |
| F    | -0.439332 | -4.659779 | 3.710966  |
| F    | -1.785147 | -4.114227 | 6.028733  |
| F    | -2.724995 | -1.577732 | 6.484406  |
| F    | -2.373626 | 0.348336  | 4.655312  |
| C    | 0.116593  | 0.005913  | 1.001970  |
| C    | 1.430218  | 0.130985  | 1.469517  |
| C    | 2.533249  | 0.231165  | 0.636685  |
| C    | 2.450378  | 0.206700  | -0.761387 |
| C    | 1.145581  | 0.056593  | -1.237946 |
| C    | 0.039977  | -0.046022 | -0.390291 |
| P    | 3.963207  | 0.624275  | -1.733568 |
| C    | 5.110332  | -0.770320 | -1.289536 |
| F    | 3.762784  | 0.425750  | 1.213790  |
| F    | 1.669672  | 0.205686  | 2.802267  |
| F    | -1.158819 | -0.174505 | -1.007356 |
| F    | 0.904661  | 0.045598  | -2.575604 |
| C    | 3.581650  | 0.145141  | -3.485333 |
| N    | 3.606452  | 3.594574  | 0.448199  |
| C    | 4.695180  | 3.837758  | 1.467921  |
| C    | 4.995025  | 5.347792  | 1.469592  |
| C    | 2.354813  | 3.923166  | 0.588194  |
| C    | 1.323587  | 3.862860  | -0.413277 |
| C    | 1.595626  | 3.720607  | -1.793471 |
| C    | 0.547551  | 3.686960  | -2.700913 |
| C    | -0.777645 | 3.785425  | -2.249921 |
| C    | -1.058649 | 3.925893  | -0.888840 |
| C    | -0.013206 | 3.976926  | 0.027552  |
| C    | 4.235138  | 3.357895  | 2.852899  |
| C    | 5.922002  | 3.045107  | 0.999493  |
| H    | 2.068318  | 4.291337  | 1.570549  |
| H    | -0.889301 | 1.136712  | 2.674950  |
| H    | 6.755823  | 3.238789  | 1.680591  |
| H    | 5.722255  | 1.970773  | 0.997389  |
| H    | 6.234639  | 3.348308  | -0.006798 |
| H    | 5.801742  | 5.559179  | 2.178737  |
| H    | 5.312879  | 5.690552  | 0.478725  |
| H    | 4.117905  | 5.930286  | 1.773158  |
| H    | 5.069163  | 3.458903  | 3.554515  |
| H    | 3.410051  | 3.958197  | 3.251257  |
| H    | 3.929191  | 2.308629  | 2.829307  |
| H    | 2.618867  | 3.657081  | -2.153069 |
| H    | 0.752913  | 3.583156  | -3.761833 |
| H    | -1.592669 | 3.748104  | -2.967143 |
| H    | -2.082795 | 3.983079  | -0.536530 |
| H    | -0.232867 | 4.064493  | 1.088153  |
| H    | 3.897236  | 3.117671  | -0.414537 |

Electronic Supplementary Information for Dalton Transactions  
This journal is © The Royal Society of Chemistry 2009

|   |          |           |           |
|---|----------|-----------|-----------|
| H | 6.019228 | -0.678490 | -1.894892 |
| H | 5.390726 | -0.719829 | -0.235282 |
| H | 4.650261 | -1.744957 | -1.485442 |
| H | 4.524329 | 0.211929  | -4.041125 |
| H | 3.191052 | -0.873180 | -3.569772 |
| H | 2.866184 | 0.833495  | -3.939640 |

B<sub>2a</sub> (Figure 3)

E = -3013.888336

| Atom | X         | Y         | Z         |
|------|-----------|-----------|-----------|
| C    | -1.772841 | -1.047270 | -3.241012 |
| C    | -1.237912 | -0.333016 | -2.174132 |
| C    | -0.255008 | 0.572372  | -2.585154 |
| C    | 0.111689  | 0.772139  | -3.915754 |
| C    | -0.474609 | 0.073297  | -4.977691 |
| C    | -1.423760 | -0.867795 | -4.570724 |
| B    | -1.725593 | -0.579960 | -0.624784 |
| C    | -0.485143 | -0.496240 | 0.441703  |
| C    | 0.306436  | -1.608942 | 0.725371  |
| C    | 1.352308  | -1.611594 | 1.645642  |
| C    | 1.657938  | -0.441946 | 2.333548  |
| C    | 0.899557  | 0.699671  | 2.090901  |
| C    | -0.137796 | 0.649488  | 1.162827  |
| F    | 0.082589  | -2.791117 | 0.083778  |
| F    | 2.067963  | -2.731145 | 1.878471  |
| F    | 2.669408  | -0.414770 | 3.217585  |
| F    | 1.177972  | 1.838871  | 2.751217  |
| F    | -0.816045 | 1.804551  | 0.972843  |
| F    | 0.369338  | 1.350207  | -1.672914 |
| F    | 1.074699  | 1.693026  | -4.152756 |
| P    | -0.047937 | 0.166737  | -6.787945 |
| C    | 0.907018  | 1.754240  | -6.955571 |
| F    | -2.039869 | -1.647526 | -5.505069 |
| F    | -2.774444 | -1.984013 | -3.013424 |
| C    | -2.993495 | 0.359472  | -0.161155 |
| C    | -3.647964 | 0.052337  | 1.037404  |
| C    | -4.743907 | 0.750519  | 1.535477  |
| C    | -5.248112 | 1.829651  | 0.815347  |
| C    | -4.638372 | 2.180023  | -0.385020 |
| C    | -3.541014 | 1.447247  | -0.843592 |
| F    | -3.214338 | -0.990906 | 1.788849  |
| F    | -3.016612 | 1.860140  | -2.023601 |
| F    | -5.115397 | 3.222160  | -1.092566 |
| F    | -6.313617 | 2.514484  | 1.267349  |
| F    | -5.329166 | 0.388133  | 2.696001  |
| C    | -1.685048 | 0.759844  | -7.466887 |
| N    | -2.811732 | -4.610243 | -1.982414 |
| C    | -1.788792 | -5.405920 | -2.739802 |
| C    | -2.167939 | -5.279456 | -4.228681 |
| C    | -3.733049 | -5.047767 | -1.180809 |
| C    | -4.796186 | -4.277331 | -0.578418 |
| C    | -5.102257 | -2.947557 | -0.943132 |
| C    | -6.166793 | -2.295557 | -0.335146 |
| C    | -6.923547 | -2.942685 | 0.649441  |
| C    | -6.627558 | -4.258592 | 1.019747  |
| C    | -5.577993 | -4.927514 | 0.400861  |
| C    | -0.423208 | -4.758446 | -2.462218 |
| C    | -1.796758 | -6.870068 | -2.298895 |
| H    | -3.706666 | -6.110074 | -0.955195 |
| H    | -2.439010 | -0.026365 | -7.380953 |
| H    | -2.046197 | 1.662247  | -6.961001 |
| H    | -1.546965 | 0.982291  | -8.531519 |
| H    | 1.006564  | 1.932335  | -8.033253 |
| H    | 0.415354  | 2.618674  | -6.499655 |
| H    | 1.910481  | 1.653186  | -6.536164 |
| H    | -2.764805 | -3.603239 | -2.173733 |
| H    | -1.013424 | -7.397239 | -2.851177 |
| H    | -1.576683 | -6.978403 | -1.230904 |
| H    | -2.744326 | -7.372028 | -2.527049 |
| H    | 0.341296  | -5.264118 | -3.060702 |
| H    | -0.418294 | -3.699362 | -2.737745 |
| H    | -0.151710 | -4.833797 | -1.406069 |
| H    | -1.425268 | -5.805894 | -4.837119 |
| H    | -3.150810 | -5.722613 | -4.423362 |
| H    | -2.186222 | -4.232731 | -4.548533 |

Electronic Supplementary Information for Dalton Transactions  
This journal is © The Royal Society of Chemistry 2009

|   |           |           |           |
|---|-----------|-----------|-----------|
| H | -2.148454 | -1.719721 | -0.576758 |
| H | -5.347411 | -5.952724 | 0.680850  |
| H | -7.214822 | -4.757553 | 1.784422  |
| H | -7.745328 | -2.417783 | 1.128095  |
| H | -6.401116 | -1.274672 | -0.618768 |
| H | -4.520107 | -2.421795 | -1.690349 |

TS2a (Figure 4)

Negative eigenvalue:  $-69\text{ cm}^{-1}$

E = -3013.871954

| Atom | X         | Y         | Z         |
|------|-----------|-----------|-----------|
| C    | -0.311468 | 0.315772  | -0.333036 |
| C    | -0.188540 | 0.288999  | 1.064771  |
| C    | 1.097034  | 0.214162  | 1.620122  |
| C    | 2.229746  | 0.159464  | 0.804872  |
| C    | 2.094272  | 0.178700  | -0.583879 |
| C    | 0.818954  | 0.259827  | -1.148504 |
| C    | -1.366694 | 0.408680  | 2.002953  |
| N    | -2.387532 | 1.252191  | 1.600649  |
| C    | -3.231419 | 2.129443  | 2.453464  |
| C    | -2.420539 | 2.692598  | 3.635588  |
| C    | -3.685638 | 3.287037  | 1.548790  |
| C    | -4.464686 | 1.374754  | 2.985245  |
| F    | -1.845833 | -0.445702 | 4.737454  |
| C    | -2.051320 | -1.765390 | 4.999440  |
| C    | -2.263602 | -2.658461 | 3.953018  |
| C    | -2.459225 | -3.976629 | 4.382917  |
| C    | -2.460157 | -4.363991 | 5.718030  |
| C    | -2.266940 | -3.455907 | 6.761175  |
| C    | -2.048739 | -2.141732 | 6.335760  |
| B    | -2.307853 | -2.322094 | 2.373281  |
| C    | -3.757502 | -2.138651 | 1.707231  |
| C    | -4.962421 | -2.428311 | 2.366961  |
| C    | -6.221820 | -2.247186 | 1.797325  |
| C    | -6.331972 | -1.747803 | 0.505023  |
| C    | -5.170551 | -1.443746 | -0.198682 |
| C    | -3.936150 | -1.634180 | 0.410997  |
| F    | -4.969775 | -2.918853 | 3.622087  |
| F    | -7.329434 | -2.540107 | 2.495113  |
| F    | -7.533528 | -1.550353 | -0.049421 |
| F    | -5.258360 | -0.955138 | -1.447672 |
| F    | -2.853593 | -1.308749 | -0.329514 |
| F    | -1.828143 | -1.174929 | 7.260387  |
| P    | -2.175606 | -3.802505 | 8.588335  |
| C    | -2.767522 | -5.559147 | 8.755893  |
| F    | -2.673701 | -5.676616 | 5.967470  |
| F    | -2.714061 | -4.955872 | 3.481088  |
| C    | -1.114544 | -3.037128 | 1.578655  |
| C    | 0.181030  | -2.999611 | 2.114340  |
| C    | 1.272804  | -3.654617 | 1.559739  |
| C    | 1.098743  | -4.397707 | 0.395916  |
| C    | -0.168330 | -4.477684 | -0.174985 |
| C    | -1.239517 | -3.810025 | 0.417308  |
| F    | 0.411094  | -2.306418 | 3.252677  |
| F    | -2.438051 | -3.974320 | -0.178439 |
| F    | -0.349474 | -5.205034 | -1.288618 |
| F    | 2.140530  | -5.026651 | -0.161307 |
| F    | 2.484591  | -3.579507 | 2.132904  |
| C    | -3.722608 | -2.916020 | 9.139529  |
| H    | -2.485724 | 1.398228  | 0.606224  |
| H    | -3.609927 | -1.838311 | 8.995693  |
| H    | -4.615870 | -3.259173 | 8.605282  |
| H    | -3.855673 | -3.104219 | 10.210966 |
| H    | -2.848521 | -5.746921 | 9.833052  |
| H    | -3.738052 | -5.751894 | 8.289051  |
| H    | -2.031859 | -6.257542 | 8.350204  |
| H    | -4.345651 | 3.962949  | 2.101773  |
| H    | -2.827264 | 3.864287  | 1.186106  |
| H    | -4.247369 | 2.914464  | 0.682407  |
| H    | -3.029245 | 3.420908  | 4.182095  |
| H    | -2.136062 | 1.915947  | 4.350981  |
| H    | -1.513988 | 3.197669  | 3.283176  |
| H    | -5.083282 | 2.041803  | 3.597305  |
| H    | -5.079834 | 1.006512  | 2.157996  |
| H    | -4.168612 | 0.524655  | 3.605365  |



Electronic Supplementary Information for Dalton Transactions  
This journal is © The Royal Society of Chemistry 2009

|   |           |           |           |
|---|-----------|-----------|-----------|
| H | -1.782985 | -0.800653 | 2.166570  |
| H | -1.059291 | 0.589313  | 3.028580  |
| H | 1.215736  | 0.199305  | 2.699606  |
| H | 3.215593  | 0.099435  | 1.257687  |
| H | 2.973024  | 0.129845  | -1.221491 |
| H | 0.700697  | 0.274392  | -2.228747 |
| H | -1.285671 | 0.363012  | -0.805665 |

C (Figure 4)

E = -3013.902846

| Atom | X         | Y         | Z         |
|------|-----------|-----------|-----------|
| C    | -5.269294 | -4.483182 | 0.766329  |
| C    | -5.137807 | -4.892043 | -0.566211 |
| C    | -6.209704 | -4.674141 | -1.444849 |
| C    | -7.384357 | -4.067821 | -0.996878 |
| C    | -7.507927 | -3.668003 | 0.338081  |
| C    | -6.445775 | -3.877682 | 1.219517  |
| C    | -3.869154 | -5.576782 | -1.040957 |
| N    | -3.425434 | -5.032915 | -2.326265 |
| C    | -2.227011 | -5.626485 | -2.965993 |
| C    | -2.541773 | -7.071503 | -3.391787 |
| C    | -1.955049 | -4.784438 | -4.223718 |
| C    | -0.977470 | -5.605806 | -2.056214 |
| F    | -3.168313 | -0.794648 | -2.498165 |
| C    | -2.007665 | -0.278514 | -2.960416 |
| C    | -1.100934 | 0.305660  | -2.065038 |
| C    | 0.082648  | 0.763621  | -2.658035 |
| C    | 0.335971  | 0.668658  | -4.022156 |
| C    | -0.573902 | 0.089275  | -4.914401 |
| C    | -1.746919 | -0.396368 | -4.316918 |
| B    | -1.380375 | 0.419298  | -0.528097 |
| C    | -2.801110 | 0.839989  | -0.012549 |
| C    | -3.384732 | 0.273178  | 1.130757  |
| C    | -4.643390 | 0.631224  | 1.600254  |
| C    | -5.368722 | 1.613586  | 0.927380  |
| C    | -4.831393 | 2.210787  | -0.211779 |
| C    | -3.577412 | 1.812738  | -0.662111 |
| F    | 1.024018  | 1.365715  | -1.897713 |
| F    | 1.518874  | 1.155194  | -4.458241 |
| P    | -0.295226 | -0.264765 | -6.721661 |
| C    | -1.745746 | 0.634551  | -7.477661 |
| F    | -2.667310 | -1.026639 | -5.080621 |
| F    | -2.734975 | -0.693061 | 1.807706  |
| F    | -5.165189 | 0.045218  | 2.685412  |
| F    | -6.572164 | 1.979972  | 1.372229  |
| F    | -5.523700 | 3.156915  | -0.859952 |
| F    | -3.102744 | 2.434461  | -1.758655 |
| C    | -0.217303 | 0.119463  | 0.488028  |
| C    | 0.673021  | -0.950084 | 0.309122  |
| C    | 1.734053  | -1.208893 | 1.169929  |
| C    | 1.951855  | -0.363380 | 2.256652  |
| C    | 1.093757  | 0.712350  | 2.478936  |
| C    | 0.028491  | 0.924420  | 1.609726  |
| F    | 0.500966  | -1.805150 | -0.718386 |
| F    | 2.545347  | -2.255716 | 0.966755  |
| F    | 2.976395  | -0.586858 | 3.082482  |
| F    | 1.302886  | 1.526616  | 3.522226  |
| F    | -0.764962 | 1.983305  | 1.864117  |
| C    | 1.060590  | 0.901412  | -7.231282 |
| H    | -2.681653 | 0.126991  | -7.235066 |
| H    | -1.806059 | 1.681409  | -7.160299 |
| H    | -1.615598 | 0.603425  | -8.565339 |
| H    | 1.101804  | 0.848316  | -8.325857 |
| H    | 0.890221  | 1.941438  | -6.936830 |
| H    | 2.027064  | 0.571878  | -6.843981 |
| H    | -3.291864 | -4.025628 | -2.232298 |
| H    | -1.710356 | -7.484540 | -3.974715 |
| H    | -2.695498 | -7.732124 | -2.530858 |
| H    | -3.446062 | -7.096781 | -4.009785 |
| H    | -0.100702 | -5.995119 | -2.588144 |
| H    | -0.746050 | -4.582692 | -1.732961 |
| H    | -1.116167 | -6.220806 | -1.159609 |
| H    | -1.094734 | -5.176458 | -4.777792 |
| H    | -2.828917 | -4.786734 | -4.883998 |
| H    | -1.733442 | -3.742150 | -3.959995 |

Electronic Supplementary Information for Dalton Transactions  
This journal is © The Royal Society of Chemistry 2009

|   |           |           |           |
|---|-----------|-----------|-----------|
| H | -4.442903 | -4.637012 | 1.457886  |
| H | -6.527393 | -3.565322 | 2.257742  |
| H | -8.422855 | -3.194612 | 0.685879  |
| H | -8.205951 | -3.905564 | -1.690707 |
| H | -6.106416 | -4.973431 | -2.483939 |
| H | -4.070756 | -6.646532 | -1.181375 |
| H | -3.112191 | -5.505290 | -0.240340 |

Additional complexes:

E

|   |           |           |           |
|---|-----------|-----------|-----------|
| C | -0.109399 | 0.985905  | 1.339826  |
| C | -0.015451 | -0.109917 | 0.478890  |
| C | 1.239879  | -0.715368 | 0.464687  |
| C | 2.342430  | -0.262118 | 1.176147  |
| C | 2.195229  | 0.834093  | 2.018884  |
| C | 0.951778  | 1.449128  | 2.116415  |
| B | -1.204555 | -0.675148 | -0.487061 |
| C | -2.711477 | -0.317329 | 0.032735  |
| C | -3.304489 | -1.054067 | 1.057839  |
| C | -4.594408 | -0.833990 | 1.533789  |
| C | -5.362349 | 0.181336  | 0.973903  |
| C | -4.814513 | 0.961265  | -0.040995 |
| C | -3.516583 | 0.703053  | -0.480054 |
| F | -2.617267 | -2.075155 | 1.648383  |
| F | -5.113477 | -1.603552 | 2.515202  |
| F | -6.619693 | 0.395343  | 1.397547  |
| F | -5.543185 | 1.952336  | -0.585644 |
| F | -3.046900 | 1.517718  | -1.453413 |
| F | 1.454967  | -1.813668 | -0.317950 |
| F | 3.541950  | -0.857328 | 1.035296  |
| F | 3.238552  | 1.301473  | 2.720223  |
| F | 0.797665  | 2.496041  | 2.946543  |
| F | -1.269174 | 1.675526  | 1.448996  |
| C | -0.968410 | -0.325382 | -2.074291 |
| C | -1.675132 | -1.011633 | -3.062107 |
| C | -1.497857 | -0.831276 | -4.423966 |
| C | -0.562488 | 0.067960  | -4.949980 |
| C | 0.149999  | 0.770554  | -3.974476 |
| C | -0.060218 | 0.592466  | -2.605522 |
| F | -2.602469 | -1.957679 | -2.687556 |
| F | 0.681036  | 1.379264  | -1.789703 |
| F | 1.101727  | 1.665139  | -4.330884 |
| P | -0.322266 | 0.076423  | -6.797338 |
| C | 0.870324  | 1.467472  | -7.122073 |
| F | -2.250967 | -1.584594 | -5.272452 |
| C | -1.904727 | 0.924460  | -7.309517 |
| C | -6.042485 | -4.438488 | 0.479849  |
| C | -4.653763 | -4.467350 | 0.623898  |
| C | -3.841312 | -4.872663 | -0.439838 |
| C | -4.441852 | -5.257873 | -1.648066 |
| C | -5.827692 | -5.219613 | -1.796926 |
| C | -6.631527 | -4.808522 | -0.730959 |
| C | -2.344525 | -4.963941 | -0.242042 |
| N | -1.568882 | -4.297427 | -1.366474 |
| C | -0.271118 | -4.967669 | -1.865697 |
| C | 0.745980  | -4.960833 | -0.720307 |
| C | -0.596286 | -6.385700 | -2.351875 |
| C | 0.220629  | -4.105409 | -3.035850 |
| H | -2.761436 | 0.276538  | -7.103667 |
| H | -2.048524 | 1.883992  | -6.800251 |
| H | -1.863843 | 1.099235  | -8.390962 |
| H | 0.914738  | 1.577797  | -8.212427 |
| H | 0.573678  | 2.424058  | -6.683178 |
| H | 1.872973  | 1.210318  | -6.770224 |
| H | -1.356008 | -3.316001 | -1.073589 |
| H | 0.291319  | -6.796746 | -2.841473 |
| H | -0.862718 | -7.069159 | -1.540580 |
| H | -1.405625 | -6.387192 | -3.091971 |
| H | 1.620591  | -5.544808 | -1.023015 |
| H | 1.080454  | -3.940272 | -0.514456 |
| H | 0.350034  | -5.411861 | 0.194966  |
| H | 1.165512  | -4.513787 | -3.406778 |
| H | -0.491922 | -4.103541 | -3.869461 |

Electronic Supplementary Information for Dalton Transactions  
This journal is © The Royal Society of Chemistry 2009

|   |           |           |           |
|---|-----------|-----------|-----------|
| H | 0.401220  | -3.071701 | -2.725997 |
| H | -4.204635 | -4.155127 | 1.562162  |
| H | -6.658050 | -4.108933 | 1.311635  |
| H | -7.710905 | -4.774418 | -0.846470 |
| H | -6.276613 | -5.512584 | -2.742325 |
| H | -3.839434 | -5.611864 | -2.483363 |
| H | -2.022655 | -6.005436 | -0.194320 |
| H | -2.043817 | -4.470852 | 0.682949  |
| H | -1.124297 | -1.902321 | -0.402341 |
| H | -2.193044 | -4.173679 | -2.170452 |

C<sub>b</sub>

E = -3249.767182

|   |           |           |           |
|---|-----------|-----------|-----------|
| C | -0.154023 | 1.030433  | 1.666178  |
| C | -0.315404 | 0.285818  | 0.486308  |
| C | 0.687931  | -0.665398 | 0.236190  |
| C | 1.763014  | -0.879139 | 1.092649  |
| C | 1.880317  | -0.107896 | 2.247195  |
| C | 0.918426  | 0.859940  | 2.533178  |
| B | -1.514263 | 0.515544  | -0.499892 |
| C | -2.944285 | 0.845972  | 0.050585  |
| C | -3.442808 | 0.261477  | 1.226399  |
| C | -4.671186 | 0.595472  | 1.780076  |
| C | -5.451319 | 1.575284  | 1.166607  |
| C | -5.010422 | 2.178688  | -0.007961 |
| C | -3.786396 | 1.796863  | -0.552784 |
| F | -2.720945 | -0.679104 | 1.863440  |
| F | -5.110666 | 0.002063  | 2.895484  |
| F | -6.612847 | 1.938832  | 1.709856  |
| F | -5.765458 | 3.123630  | -0.584171 |
| F | -3.398477 | 2.433491  | -1.673355 |
| F | 0.618859  | -1.454138 | -0.851770 |
| F | 2.678419  | -1.819245 | 0.824395  |
| F | 2.905146  | -0.300176 | 3.078242  |
| F | 1.034406  | 1.610593  | 3.635432  |
| F | -1.048066 | 1.982680  | 1.991822  |
| C | -1.250895 | 0.432784  | -2.050348 |
| C | -1.810708 | -0.537949 | -2.878463 |
| C | -1.542519 | -0.591698 | -4.241762 |
| C | -0.728284 | 0.342038  | -4.900147 |
| C | -0.207208 | 1.338418  | -4.068616 |
| C | -0.431722 | 1.359050  | -2.695645 |
| F | -2.585269 | -1.520760 | -2.355787 |
| F | 0.132252  | 2.353562  | -1.967001 |
| F | 0.545461  | 2.336378  | -4.579536 |
| P | -0.456724 | 0.029034  | -6.730927 |
| C | 1.353089  | 0.528471  | -7.142485 |
| F | -2.103685 | -1.601036 | -4.935104 |
| C | -1.715024 | 1.250782  | -7.505032 |
| C | -5.972267 | -4.260756 | 1.200576  |
| C | -4.836294 | -4.879367 | 0.671734  |
| C | -4.727178 | -5.136310 | -0.701163 |
| C | -5.779381 | -4.746605 | -1.543108 |
| C | -6.912696 | -4.122907 | -1.016454 |
| C | -7.016073 | -3.878432 | 0.355652  |
| C | -3.489878 | -5.825307 | -1.250318 |
| N | -3.144763 | -5.308543 | -2.573918 |
| C | -2.022566 | -5.938553 | -3.309850 |
| C | -0.685848 | -5.880613 | -2.535123 |
| C | -2.374105 | -7.401533 | -3.632749 |
| C | -1.882945 | -5.162408 | -4.629704 |
| C | -3.106364 | 0.651084  | -7.205895 |
| C | -1.680016 | 2.699922  | -6.991813 |
| C | -1.509822 | 1.230650  | -9.034143 |
| C | 1.665377  | -0.280425 | -8.427968 |
| C | 1.706893  | 2.001524  | -7.413562 |
| C | 2.255059  | -0.020406 | -6.019565 |
| H | -2.988486 | -4.300946 | -2.502988 |
| H | -1.609123 | -7.836171 | -4.286723 |
| H | -2.425182 | -8.026683 | -2.734212 |
| H | -3.340638 | -7.455885 | -4.145796 |
| H | 0.130550  | -6.308956 | -3.129776 |
| H | -0.418422 | -4.842734 | -2.297847 |
| H | -0.736517 | -6.440537 | -1.594135 |

Electronic Supplementary Information for Dalton Transactions  
This journal is © The Royal Society of Chemistry 2009

|   |           |           |           |
|---|-----------|-----------|-----------|
| H | -1.056442 | -5.558070 | -5.231217 |
| H | -2.806815 | -5.233594 | -5.214116 |
| H | -1.684415 | -4.101353 | -4.444687 |
| H | -4.021254 | -5.164010 | 1.334860  |
| H | -6.035912 | -4.068884 | 2.268851  |
| H | -7.900436 | -3.393263 | 0.761546  |
| H | -7.720858 | -3.826519 | -1.681503 |
| H | -5.691681 | -4.929403 | -2.610035 |
| H | -3.696751 | -6.898139 | -1.352552 |
| H | -2.679189 | -5.735803 | -0.505182 |
| H | -2.456402 | 3.286134  | -7.503679 |
| H | -1.887669 | 2.754272  | -5.918321 |
| H | -0.721204 | 3.189449  | -7.174864 |
| H | -2.322914 | 1.789510  | -9.516470 |
| H | -0.569660 | 1.701057  | -9.337187 |
| H | -1.527305 | 0.209888  | -9.433804 |
| H | -3.875072 | 1.253294  | -7.708741 |
| H | -3.193633 | -0.379474 | -7.565805 |
| H | -3.336253 | 0.657132  | -6.134802 |
| H | 2.711506  | -0.111823 | -8.717238 |
| H | 1.524340  | -1.355421 | -8.274138 |
| H | 1.039114  | 0.022692  | -9.273469 |
| H | 2.779739  | 2.070692  | -7.643535 |
| H | 1.170786  | 2.399924  | -8.280534 |
| H | 1.511674  | 2.648463  | -6.558712 |
| H | 3.300814  | -0.004151 | -6.355604 |
| H | 2.194258  | 0.580241  | -5.108118 |
| H | 2.009788  | -1.059377 | -5.767421 |

B2<sub>b</sub>

E = -3249.752899

|   |           |           |           |
|---|-----------|-----------|-----------|
| C | -4.207165 | -5.388087 | 1.101704  |
| C | -3.891197 | -4.722001 | -0.102216 |
| C | -4.582664 | -3.540508 | -0.447828 |
| C | -5.559999 | -3.042934 | 0.403115  |
| C | -5.847052 | -3.695741 | 1.607907  |
| C | -5.170634 | -4.868572 | 1.958464  |
| C | -2.870628 | -5.318041 | -0.930612 |
| N | -2.290171 | -4.773757 | -1.955275 |
| C | -1.309932 | -5.396806 | -2.907236 |
| C | -0.989086 | -6.836757 | -2.503179 |
| C | -1.978411 | -5.357078 | -4.295815 |
| C | -0.043502 | -4.523662 | -2.879254 |
| F | -2.755967 | -2.206965 | -3.024012 |
| C | -1.913651 | -1.125569 | -3.261909 |
| C | -1.537430 | -0.298501 | -2.212386 |
| C | -0.699279 | 0.739486  | -2.626641 |
| C | -0.311355 | 0.939345  | -3.948062 |
| C | -0.710186 | 0.103427  | -4.998602 |
| C | -1.531383 | -0.953558 | -4.587447 |
| B | -2.060184 | -0.520357 | -0.673343 |
| C | -3.383266 | 0.380592  | -0.301339 |
| C | -4.045803 | 0.145301  | 0.907777  |
| C | -5.188692 | 0.822915  | 1.321922  |
| C | -5.733567 | 1.808714  | 0.503620  |
| C | -5.118759 | 2.082744  | -0.711618 |
| C | -3.977669 | 1.372560  | -1.084829 |
| F | -0.266855 | 1.646168  | -1.721057 |
| F | 0.478727  | 2.008850  | -4.199919 |
| P | -0.329677 | 0.220586  | -6.824918 |
| C | -1.481388 | 1.662524  | -7.363631 |
| F | -1.995564 | -1.858299 | -5.488736 |
| F | -3.569138 | -0.798796 | 1.760022  |
| F | -5.779605 | 0.527291  | 2.498952  |
| F | -6.838507 | 2.477064  | 0.877805  |
| F | -5.629202 | 3.029625  | -1.521201 |
| F | -3.459151 | 1.713922  | -2.290553 |
| C | -0.835084 | -0.328565 | 0.401065  |
| C | 0.044594  | -1.378085 | 0.670626  |
| C | 1.116090  | -1.293933 | 1.555547  |
| C | 1.356880  | -0.097969 | 2.222681  |
| C | 0.501211  | 0.977055  | 2.005998  |
| C | -0.561667 | 0.841124  | 1.115252  |
| F | -0.107687 | -2.582042 | 0.044682  |
| F | 1.920453  | -2.356191 | 1.771562  |
| F | 2.404990  | 0.019340  | 3.056609  |

|   |           |           |           |
|---|-----------|-----------|-----------|
| F | 0.716456  | 2.138721  | 2.650142  |
| F | -1.341634 | 1.934817  | 0.958876  |
| C | 1.534437  | 0.682723  | -6.996317 |
| H | -2.557637 | -6.327246 | -0.679456 |
| C | -2.912699 | 1.088963  | -7.257267 |
| C | -1.415456 | 2.965937  | -6.548576 |
| C | -1.195732 | 1.960853  | -8.850539 |
| C | 1.916639  | 0.165046  | -8.405615 |
| C | 1.965521  | 2.156663  | -6.891904 |
| C | 2.310015  | -0.158671 | -5.961870 |
| H | -2.502798 | -3.794707 | -2.178254 |
| H | -0.277452 | -7.243960 | -3.227062 |
| H | -0.518426 | -6.895854 | -1.515259 |
| H | -1.875385 | -7.481821 | -2.521728 |
| H | 0.679974  | -4.917804 | -3.600068 |
| H | -0.263723 | -3.488642 | -3.156258 |
| H | 0.414692  | -4.519834 | -1.885682 |
| H | -1.284353 | -5.758853 | -5.041135 |
| H | -2.889875 | -5.965022 | -4.311081 |
| H | -2.231109 | -4.334714 | -4.591639 |
| H | -2.412635 | -1.677256 | -0.581418 |
| H | -3.680320 | -6.302060 | 1.365460  |
| H | -5.396607 | -5.372758 | 2.892980  |
| H | -6.600003 | -3.285176 | 2.274570  |
| H | -6.089948 | -2.134127 | 0.137576  |
| H | -4.366470 | -3.013998 | -1.370684 |
| H | -2.134476 | 3.686873  | -6.963618 |
| H | -1.687328 | 2.805266  | -5.501241 |
| H | -0.427575 | 3.430671  | -6.574860 |
| H | -3.628822 | 1.830424  | -7.637291 |
| H | -3.029531 | 0.171439  | -7.844631 |
| H | -3.190294 | 0.869968  | -6.220563 |
| H | -1.960978 | 2.648972  | -9.234773 |
| H | -0.223911 | 2.441162  | -9.001124 |
| H | -1.229545 | 1.051973  | -9.463081 |
| H | 3.054313  | 2.218239  | -7.033167 |
| H | 1.508428  | 2.773992  | -7.671621 |
| H | 1.731591  | 2.595691  | -5.922274 |
| H | 3.383023  | -0.118463 | -6.194336 |
| H | 2.178030  | 0.213906  | -4.942424 |
| H | 2.007361  | -1.213153 | -5.985911 |
| H | 2.991680  | 0.319878  | -8.571442 |
| H | 1.705252  | -0.904262 | -8.514067 |
| H | 1.382296  | 0.694031  | -9.201874 |

### TS2<sub>b</sub>

Negative eigenvalue: -70 cm<sup>-1</sup>

E = -3249.739119

|   |           |           |           |
|---|-----------|-----------|-----------|
| C | -0.039583 | -0.153405 | 0.194340  |
| C | -0.118321 | -0.008558 | 1.584496  |
| C | 1.115504  | -0.119766 | 2.240775  |
| C | 2.329292  | -0.323920 | 1.594420  |
| C | 2.352195  | -0.436548 | 0.207579  |
| C | 1.154710  | -0.356389 | -0.494947 |
| B | -1.468633 | 0.224683  | 2.446521  |
| C | -2.854823 | 0.555387  | 1.669820  |
| C | -4.052868 | -0.153709 | 1.844275  |
| C | -5.246012 | 0.170189  | 1.197797  |
| C | -5.289104 | 1.251456  | 0.325102  |
| C | -4.127723 | 1.986662  | 0.109217  |
| C | -2.962046 | 1.625325  | 0.773580  |
| F | -4.114433 | -1.229456 | 2.657567  |
| F | -6.356111 | -0.553278 | 1.414673  |
| F | -6.430290 | 1.585687  | -0.291528 |
| F | -4.145053 | 3.043453  | -0.723496 |
| F | -1.868935 | 2.385418  | 0.503688  |
| F | 1.168808  | -0.041577 | 3.592984  |
| F | 3.473331  | -0.412329 | 2.294864  |
| F | 3.511068  | -0.622163 | -0.441220 |
| F | 1.157696  | -0.479754 | -1.833238 |
| F | -1.155828 | -0.133437 | -0.567920 |
| C | -1.589886 | -0.789391 | 3.709513  |
| C | -2.042188 | -0.429877 | 4.974852  |
| C | -2.115955 | -1.301706 | 6.055764  |
| C | -1.754132 | -2.652478 | 5.960509  |
| C | -1.331401 | -3.031829 | 4.681320  |

Electronic Supplementary Information for Dalton Transactions  
This journal is © The Royal Society of Chemistry 2009

|   |           |           |          |
|---|-----------|-----------|----------|
| C | -1.248975 | -2.142412 | 3.613510 |
| F | -2.450540 | 0.853902  | 5.202640 |
| F | -0.840263 | -2.651964 | 2.423792 |
| F | -0.969722 | -4.312411 | 4.431676 |
| P | -1.855715 | -3.658688 | 7.543579 |
| C | -3.440110 | -4.711911 | 7.253228 |
| F | -2.561667 | -0.789829 | 7.225541 |
| C | -0.262305 | -4.748984 | 7.628127 |
| N | -1.861165 | 3.734749  | 3.221828 |
| C | -3.020392 | 4.171171  | 4.052342 |
| C | -4.258573 | 3.290559  | 3.799113 |
| C | -0.886460 | 2.843214  | 3.526584 |
| C | 0.490619  | 3.082445  | 2.994869 |
| C | 0.745807  | 3.557631  | 1.698314 |
| C | 2.050964  | 3.841013  | 1.297842 |
| C | 3.117946  | 3.657488  | 2.183506 |
| C | 2.872664  | 3.184418  | 3.474156 |
| C | 1.567453  | 2.892724  | 3.874111 |
| C | -2.646164 | 4.156850  | 5.543872 |
| C | -3.312479 | 5.618101  | 3.612042 |
| H | -1.805040 | 4.170514  | 2.309096 |
| C | -4.602342 | -3.694373 | 7.311239 |
| C | -3.537010 | -5.498159 | 5.935214 |
| C | -3.582612 | -5.672895 | 8.452253 |
| C | -0.085174 | -5.019274 | 9.143554 |
| C | -0.227846 | -6.097798 | 6.887174 |
| C | 0.921408  | -3.870958 | 7.169495 |
| H | -4.176814 | 6.008820  | 4.158612 |
| H | -2.455645 | 6.272253  | 3.809304 |
| H | -3.550807 | 5.668349  | 2.541554 |
| H | -3.459833 | 4.610037  | 6.119860 |
| H | -2.504586 | 3.144032  | 5.930506 |
| H | -1.736695 | 4.740667  | 5.727223 |
| H | -5.100782 | 3.650035  | 4.401950 |
| H | -4.557300 | 3.329182  | 2.746193 |
| H | -4.066547 | 2.249944  | 4.069367 |
| H | -1.196305 | 1.511581  | 3.012231 |
| H | -0.904389 | 2.521605  | 4.562696 |
| H | 1.384319  | 2.513806  | 4.876165 |
| H | 3.694707  | 3.032382  | 4.167903 |
| H | 4.133636  | 3.877172  | 1.865817 |
| H | 2.235340  | 4.200894  | 0.289148 |
| H | -0.062798 | 3.693827  | 0.987999 |
| H | -5.559099 | -4.230411 | 7.243005 |
| H | -4.599353 | -3.123841 | 8.246599 |
| H | -4.566291 | -2.982748 | 6.478700 |
| H | -4.498173 | -6.031934 | 5.901693 |
| H | -3.503130 | -4.836304 | 5.064417 |
| H | -2.742389 | -6.239848 | 5.827397 |
| H | -4.568876 | -6.155869 | 8.416207 |
| H | -2.830748 | -6.468587 | 8.441463 |
| H | -3.508586 | -5.143355 | 9.409674 |
| H | 1.864330  | -4.359325 | 7.451792 |
| H | 0.937638  | -3.727072 | 6.085719 |
| H | 0.908252  | -2.883352 | 7.647465 |
| H | 0.746145  | -6.576602 | 7.065204 |
| H | -0.993356 | -6.788857 | 7.254701 |
| H | -0.350224 | -5.987634 | 5.809386 |
| H | 0.847063  | -5.577433 | 9.307541 |
| H | -0.028259 | -4.087063 | 9.716017 |
| H | -0.903545 | -5.617612 | 9.558668 |
